1 **Title:** Genomic interrogation of the burden and transmission of multidrug-resistant pathogens  
2 within and across hospital networks

3

4 **Running title:** Burden & transmission of MDROs

5

6 **Authors:** Norelle L. Sherry<sup>a,b,c</sup>, Robyn S. Lee<sup>at</sup>, Claire L. Gorrie<sup>a</sup>, Jason C. Kwong<sup>a,b,c</sup>, Rhonda L.  
7 Stuart<sup>d,e</sup>, Tony Korman<sup>d,e,f</sup>, Caroline Marshall<sup>g,h</sup>, Charlie Higgs<sup>b</sup>, Hiu Tat Chan<sup>i</sup>, Maryza  
8 Graham<sup>d,e,f</sup>, Paul D.R. Johnson<sup>c,h,j</sup>, Marcel Leroi<sup>k</sup>, Caroline Reed<sup>i,l</sup>, Michael Richards<sup>g,h</sup>, Monica A.  
9 Slavin<sup>m,n</sup>, Leon J. Worth<sup>m,n</sup>, Benjamin P. Howden<sup>a,b,c\*</sup>, M. Lindsay Grayson<sup>c,h,j,k#\*</sup> on behalf of the  
10 Controlling Superbugs Study Group

11 <sup>†</sup> Current affiliation: Epidemiology Division, Dalla Lana School of Public Health, University of  
12 Toronto, Toronto, Canada, and Centre for Communicable Disease Dynamics, Harvard T.H. Chan  
13 School of Public Health

14 \* Authors contributed equally

15 # Corresponding author

16

17 **Affiliations:**

18 <sup>a</sup> Microbiological Diagnostic Unit (MDU) Public Health Laboratory, Department of Microbiology  
19 & Immunology at the Peter Doherty Institute for Infection & Immunity, University of  
20 Melbourne, Melbourne, Victoria, Australia

21 <sup>b</sup> Department of Microbiology & Immunology at the Peter Doherty Institute for Infection &  
22 Immunity, University of Melbourne, Melbourne, Victoria, Australia

23 <sup>c</sup> Department of Infectious Diseases, Austin Health, Heidelberg, Victoria, Australia

24 <sup>d</sup> Department of Infectious Diseases, Monash Health, Clayton, Victoria, Australia

25 <sup>e</sup> Department of Medicine, Monash University, Clayton, Victoria, Australia

26 <sup>f</sup> Department of Microbiology, Monash Health, Clayton, Victoria, Australia

27 <sup>g</sup> Victorian Infectious Diseases Service, Melbourne Health, Parkville, Victoria, Australia

28 <sup>h</sup> Peter Doherty Institute for Infection & Immunity, Melbourne, Victoria, Australia

29 <sup>i</sup> Department of Microbiology, Melbourne Health, Parkville, Victoria, Australia

30 <sup>j</sup> Department of Medicine, Austin Health, University of Melbourne, Heidelberg, Victoria,  
31 Australia

32 <sup>k</sup> Department of Microbiology, Austin Health, Heidelberg, Victoria, Australia

33 <sup>l</sup> Department of Microbiology, Peter MacCallum Cancer Centre, Parkville, Victoria, Australia

34 <sup>m</sup> Department of Infectious Diseases, Peter MacCallum Cancer Centre, Parkville, Victoria,  
35 Australia

36 <sup>n</sup> National Centre for Infections in Cancer, Sir Peter MacCallum Department of Oncology,  
37 University of Melbourne, Melbourne, Victoria, Australia

38

39 **Corresponding author:** Prof. M. Lindsay Grayson, Department of Infectious Diseases, Austin  
40 Health. Email: [lindsay.grayson@austin.org.au](mailto:lindsay.grayson@austin.org.au) and

41 **Alternate corresponding author:** Prof. Benjamin Howden, MDU Public Health Laboratory,  
42 Department of Microbiology & Immunology at the Peter Doherty Institute for Infection and  
43 Immunity, University of Melbourne. Email: [bhowden@unimelb.edu.au](mailto:bhowden@unimelb.edu.au).

44

45

46 **Keywords:** genomics, infection control, MRSA, VRE, extended-spectrum beta-lactamase

47

48 **Key points (40 words):**

49 We conducted a prospective multi-center study to investigate multidrug-resistant organisms  
50 (MDROs), using genomics to define the burden, distribution, and transmission of MDROs within  
51 and between hospital networks, defining a new benchmarking measure for future genomic  
52 studies.

53 **Abstract**

54 *Background*

55 Multidrug-resistant organisms (MDROs) disproportionately affect hospitalized patients due to  
56 the combination of comorbidities, frequent antimicrobial use, and in-hospital MDRO  
57 transmission. Identification of MDRO transmission by hospital microbiology laboratories is  
58 difficult due to limitations of existing typing methods.

59

60 *Methods*

61 We conducted a prospective multicenter genomics implementation study (8 hospitals, 2800  
62 beds) from 24<sup>th</sup> April to 18<sup>th</sup> June 2017 in Melbourne, Australia. Clinical and screening isolates  
63 from hospital inpatients were collected for six MDROs (*vanA* VRE, MRSA, ESBL *E. coli* [ESBL-Ec]  
64 and *Klebsiella pneumoniae* [ESBL-Kp], and carbapenem-resistant *Pseudomonas aeruginosa*  
65 [CRPa] and *Acinetobacter baumannii* [CRAb]), sequenced (Illumina NextSeq) and analyzed using  
66 open-source tools. MDRO transmission was assessed by genomics (core SNP phylogeny,  
67 grouped by species and ST) and compared to epidemiologic data.

68

69 *Results*

70 408 isolates were collected from 358 patients; 47.5% were screening isolates. ESBL-Ec was most  
71 common (52.5%), then MRSA (21.6%), *vanA* VRE (15.7%) and ESBL-Kp (7.6%).

72

73 We define the transmission rate for each MDRO by genomics and epidemiology; 31.6% of all  
74 study patients had potential genomic links to other study isolates; 86% of these were confirmed

75 by epidemiologic links (probable or possible transmission). The highest transmission rates  
76 occurred with *vanA* VRE (88.4% of patients).

77

### 78 *Conclusions*

79 Combining genomics with high-quality epidemiologic data gives substantial insights into the  
80 burden and distribution of critical MDROs in hospitals, including in-hospital transmission. By  
81 defining transmission rates by genomics, we hope to enable comparisons over time and  
82 between sites, and introduce this as a new outcome measure to assess the efficacy of infection  
83 control interventions.

84

## 85 Introduction

86 Multidrug-resistant organisms (MDROs) are increasing globally, and disproportionately affect  
87 hospital patients [1, 2]. Infections with these pathogens may be acquired in healthcare settings  
88 or in the community, and are associated with increased morbidity, mortality, length of hospital  
89 stay and healthcare costs [2-4]. Whilst many healthcare systems, including those in Australia,  
90 have successfully implemented surveillance programs for low-burden, high-impact pathogens,  
91 such as carbapenemase-producing Enterobacteriaceae (CPE)[5-10], these surveillance systems  
92 do not always comprehensively address more common MDROs, resulting in incomplete data  
93 about some MDROs frequently affecting patients, such as extended-spectrum beta-lactamase-  
94 producing *E. coli* (ESBL-Ec) or methicillin-resistant *Staphylococcus aureus* (MRSA).

95  
96 In Australia, as in Europe, the major pathogen surveillance programs such as Australian Group  
97 for Antimicrobial Resistance (AGAR) and the Victorian Hospital Pathogens Surveillance System  
98 (VHPSS) [11, 12] focus on isolates from bacteremic patients, meaning the true burden of  
99 MDROs, many of which lead to colonization or non-bacteremic infection, is undefined and  
100 poorly understood [9, 11]. Australia has one the highest rates of VRE in the world (47.0% in  
101 2017 [13]), having been dominated by *vanB* until the last five years, when *vanA* VRE has  
102 emerged rapidly across multiple states [14]. Whilst the patient risk factors of MDRO acquisition  
103 are well understood for most of these organisms [15-22], further analysis using whole genome  
104 sequencing has the potential to add further insights, particularly defining the relatedness of  
105 isolates by genomics (and hence putative transmission when combined with epidemiologic  
106 data), which to date has only just started to be applied in a clinical setting [23, 24].

107

108 In this genomics implementation and evaluation study, we performed comprehensive  
109 surveillance of the clinical and genomic epidemiology of MDROs across multiple hospitals over  
110 a two-month period, to (i) estimate the local burden of MDRO infection and colonization, (ii)  
111 assess risk factors for MDRO acquisition, (iii) establish the local population structure and  
112 compare to national and international data, and (iv) investigate the use of genomics to predict  
113 in-hospital MDRO transmission, and define a transmission rate per occupied bed days.

114

## 115 **Methods**

116 An overview of methods (including inclusion and exclusion criteria) is given in Figure 1, with  
117 more detailed information available in Supplementary Data.

118

### 119 *Study design*

120 We conducted a prospective multicenter study of eight hospital sites from four hospital  
121 networks (Table 1), covering approximately 2800 acute and subacute (aged care/rehabilitation)  
122 patient beds. Isolates were collected during an eight-week pilot study (24<sup>th</sup> April to 18<sup>th</sup> June  
123 2017), conducted as part of a larger study for the Melbourne Genomics Health Alliance, using  
124 genomics for MDRO surveillance in hospitals. Clinical and screening isolates of six MDROs were  
125 collected from hospital inpatients: *vanA* vancomycin-resistant *Enterococcus faecium* (*vanA*  
126 VRE), methicillin-resistant *Staphylococcus aureus*, extended-spectrum beta-lactamase (ESBL)-  
127 phenotype *Escherichia coli* and *Klebsiella pneumoniae* (ESBL-Ec and ESBL-Kp), carbapenem-  
128 resistant *Acinetobacter baumannii* complex (CRAb) and carbapenem-resistant *Pseudomonas*

129 *aeruginosa* (CRPa)(Table 2). Carbapenem-resistant Enterobacterales (CPE) were excluded, as  
130 these were already collected for a comprehensive state-wide CPE surveillance program [5, 27].  
131 Whilst *vanB* VRE are dominant in Australia, we elected to focus on *vanA* VRE as it emerged  
132 more recently in Victoria, has a greater level of associated antimicrobial resistance and costs,  
133 and could potentially be more amenable to infection control interventions.

134

#### 135 *MDRO screening protocols*

136 Existing MDRO screening protocols varied between hospitals (Table 1); further details are  
137 available in Supplementary Data. Hospital infection control practices (including patient isolation  
138 and organism-specific terminal cleaning practices) were assessed at baseline and at the  
139 conclusion of the study; no changes were made during the study period. Results of genomic  
140 analyses were not available to hospitals during the study period.

141

#### 142 *Sequencing laboratory workflow and bioinformatics analysis*

143 See Figure 1 and Supplementary Data for detailed methods (including Supplementary Table S1  
144 [References genomes used for transmission analysis]).

145

146 This study was approved by the Melbourne Health Human Research Ethics Committee (HREC)  
147 and endorsed by the corresponding HREC at each participating site.

148

149

150

151 *Data availability*

152 Raw sequence data has been uploaded to the Sequence Read Archive under BioProject  
153 PRJNA\*\*\*\*\* (to be uploaded soon).

154

155 **Results**

156 *Isolate numbers, patient demographics and specimen types*

157 During the eight-week study period (24<sup>th</sup> April to 18<sup>th</sup> June 2017), 408 MDRO isolates from 358  
158 patients were collected; most patients (88.3%) only had a single isolate included, 10.1% had  
159 two isolates, and 1.7% had three or more isolates. The median age of patients was 67yo, and  
160 was similar for most species except CRAB (only two patients)(Table 3).

161

162 Overall, 47.5% of isolates were collected for screening purposes, although this varied between  
163 species; the majority of *vanA* VRE isolates were from screening samples (81.3%), whereas the  
164 majority of MRSA isolates (92.0%) were from clinical samples (collected for suspected  
165 infection)(Figure 2a and Supplementary Table S2). Of the clinical samples, urine specimens  
166 were most common (45.8% of clinical isolates), followed by non-sterile sites (25.2%), blood  
167 cultures (10.7%), respiratory specimens (9.8%) and other sterile sites (8.4%). Blood cultures  
168 represented a small proportion of clinical isolates for most species (8.6% [MRSA] to 14.3%  
169 [ESBL-Kp]), except *vanA* VRE (33.3% of clinical isolates, although small number of clinical  
170 isolates overall [n=12]).

171

172



173 *High rates of MDRO isolation, especially ESBL-Ec and MRSA*

174 To define the incidence of each MDRO (and to enable comparisons between different wards  
175 and hospital sites), we calculated rates per 100,000 occupied bed days. MDRO infections  
176 occurred at a rate of 107.1 patients per 100,000 occupied bed days (OBDs), whilst the overall  
177 MDRO burden (both infection and colonization) was 294.5 patients per 100,000 OBDs.  
178 Considering infection only (as this not affected by different screening practices), rates were  
179 much higher in patients on high-risk wards or ICU (infection rate, 151.1, and total burden, 900.4  
180 patients per 100,000 OBDs)(Figure 4 and Table 4). ESBL-Ec infections were most common,  
181 followed by MRSA and ESBL-Kp, whilst colonization rates were highest in ESBL-Ec and *vanA* VRE.  
182 CRPa and CRAb were uncommon in participating sites (total burden 6.3 and 1.6 patients per  
183 100,000 OBDs respectively).

184

185 *There are differences in time-to-collection profiles between MDROs*

186 To investigate the likely location of MDRO acquisition, 193/333 (58.0%) non-duplicate isolates  
187 were collected within the first two days of hospital admission (excluding patients transferred  
188 from other hospitals). The majority of MDROs were isolated within the first week of admission  
189 (0-7 days, excluding patients transferred from other healthcare facilities), particularly MRSA  
190 (86.3%), ESBL-Ec (81.0%) and ESBL-Kp (70.8%). In contrast, only 60.0% of CRPa and 50% of *vanA*  
191 VRE were collected in the first week of admission. The two CRAb isolates were both from  
192 clinical samples taken in the second week of admission from patients transferred from  
193 overseas. These proportions were similar for both screening and clinical isolates, except for

194 *vanA* VRE, where more clinical isolates were detected in weeks two and three of admission  
195 (25% and 33% of *vanA* VRE screening isolates, respectively), compared to week one (Figure 5).

196

197 *Very few MDROs were isolated from patients without healthcare contact*

198 25.7% of MDROs were isolated from patients with a known history of colonization with that  
199 MDRO in the previous 12 months; 60.7% of these were thought to represent infection rather  
200 than colonization (mostly ESBL-Ec and MRSA)(data not shown).

201

202 Only a small number of patients (42 patients, 11.7%) had MDROs isolated without a history of  
203 healthcare exposure (admitted from home, no known admissions in last 12m, not known to be  
204 colonized in last 12m or unknown colonization status)(Figure 3). Most of these were ESBL-Ec  
205 (32 patients, 25.0% were clinical isolates); 18/32 patients had ESBL-Ec isolates within the first  
206 two days of admission. In contrast, only four patients with MRSA (4.6% of MRSA), and six  
207 patients with *vanA* VRE (10.0% of VRE) had a similar lack of healthcare exposure (as defined  
208 above). Further data regarding wards and medical units where MDROs were isolated are  
209 detailed in Supplementary Table S2.

210

211 *Molecular epidemiology reveals unique features of local MDRO population structures*

212 To investigate the local population structures of each MDRO and allow comparisons to national  
213 and international data, we examined the most common multilocus sequence types for each  
214 species. Population structures figures by eBURST methodology for all species are available in  
215 Supplementary Figure 1.

216 **vanA VRE**

217 Of the *vanA* VRE isolates, ST1421 was the dominant sequence type (62.5%), followed by ST203  
218 (28.1%)(Figure 6). Notably, ST1424 (a dominant ST in neighbouring states of Australia) and ST  
219 796 (a common ST amongst Australian *vanB* isolates) were absent [13].

220

221 **MRSA**

222 ST22 was most common amongst MRSA (25.6%), followed by ST45 (18.9%)(Figure 6). Some  
223 clones were more likely isolated in the first two days of admission (ST30 88.9% and ST93 100%  
224 isolated in first two days) compared with others (ST22 47.8% and ST45 58.8% isolated in first  
225 two days). Very few ST239 were isolated (dominant clone in several other Australian states).

226

227 **ESBL-Ec**

228 ST131 was by far the most common ESBL-Ec sequence type (71/218 isolates, 32.6%), followed  
229 by ST38 (6.9%), 963 (6.0%) and ST10 (5.0%)(Figure 6). Sequence types were otherwise quite  
230 diverse, with 45/56 STs having  $\leq 2$  isolates. CTX-M was the dominant ESBL gene group (85.5% of  
231 isolates), with CTX-M-15 being most common (43.0%). Two isolates had unexpected AMR genes  
232 detected (*mcr-1* and *rmtB*), prompting the implementation of enhanced infection control  
233 measures.

234

235 **ESBL-Kp**

236 ESBL-Kp were polyclonal, with only three STs represented by more than one isolate (Figure 6).  
237 CTX-M-type ESBL genes were also the most common in ESBL-Kp (87.1%).

238 *High rates of transmission detected for some MDROs*

239 To investigate the potential transmission rates for major MDROs in this study, genomic  
240 comparisons were performed and genomic links to other study patients (pairwise SNPs at or  
241 below transmission screening threshold [see Methods]) were determined. Overall, 113/358  
242 patients (31.6%) had potential genomic links to other study patients: 95.0% of *vanA* VRE, 23.3%  
243 of ESBL-Kp, 20.2% of ESBL-Ec and 11.6% of MRSA. Of these potential genomic links, 78/113  
244 patients (69.0% under genomic link screening threshold) had probable transmission by  
245 epidemiology (see definitions in Methods), and a further 19 patients had possible transmission  
246 by epidemiology (Table 5).

247  
248 Genomic data have not previously been used to define transmission rates in the hospital setting  
249 (based on patient throughput), but the precision of this technology now makes this potentially  
250 possible. The highest proportion of transmissions occurred in *vanA* VRE (36.5 probable  
251 transmissions per 100,000 OBDs), followed by ESBL-Ec (15.9 probable transmissions per  
252 100,000 OBDs), ESBL-Kp (5.6 per 100,000 OBDs) and MRSA (4.0 per 100,000 OBDs)(Figure 7).  
253 No transmission was found for *Pseudomonas* and *Acinetobacter* isolates. Probable transmission  
254 occurred mostly in intensive care and acute wards (Table 2). There was no clear threshold  
255 separating the pairwise SNP distributions for pairs designated as 'probable', 'possible' and  
256 'unlikely' transmission (Figure 8).

257

258

259

## 260 Discussion

261 In this study, we have collected comprehensive clinical and genomic data on four high-  
262 prevalence MDROs (ESBL-Ec, ESBL-Kp, MRSA and *vanA* VRE) and two low-prevalence, high-  
263 impact MDROs (CRPa and CRAb), established the local burden of infection and colonization with  
264 these MDROs, described the population structures, and used genomic data to infer putative  
265 MDRO transmission in hospitals, validated by epidemiologic data. ESBL-Ec was most common,  
266 with infection or colonization affecting at least 1.5 in every 1000 patients, higher than some  
267 other population-based estimates (e.g. 0.42 and 0.47 per 1000 patient-days in Canada 2009 and  
268 France 2013 [31, 32]). Similarly, the burden of MRSA in the study was relatively high, although  
269 still much lower than some estimates from other countries (e.g. 3 infections per 1000 patients  
270 [point-prevalence survey] in Canada in 2012 [33], compared to 0.42 per 1000 patient days in  
271 our study). Whilst *vanA* VRE was only moderately prevalent, this genotype only emerged in the  
272 last five years in Australia, where *vanB* continues to be dominant (21% of VRE *vanA* positive in a  
273 recent statewide survey, unpublished data). Interestingly, compared to other MDROs, ESBL-Kp  
274 was uncommon, indicating that this drug-resistant pathogen is not currently a major concern in  
275 our setting. Carbapenem-resistant *P. aeruginosa* and *A. baumannii* were infrequently isolated,  
276 this being a notable contrast to the high prevalence of these organisms reported in nearby  
277 Asian countries.

278  
279 The combination of genomic surveillance and patient epidemiologic data revealed important  
280 information about which patients are affected by MDROs. Whilst the majority of MDROs were  
281 isolated within the first two days of admission (particularly for ESBL-Ec and MRSA), the time

282 from admission to isolate collection had a biphasic distribution for most MDROs (i.e. many  
283 MDROs still isolated after the first week of admission, suggesting potential in-hospital MDRO  
284 acquisition), with the exception of *van A* VRE, where the majority of isolates were collected  
285 after the first week of admission. Interestingly, only 11% of patients in this study had an MDRO  
286 isolated without evidence of healthcare exposure (admitted from home, no admissions in last  
287 12 months, and not known to be colonized with the same MDRO). Together, these data suggest  
288 that more of these MDROs are acquired in hospital than previously thought, challenging the  
289 prevailing dogma in the local infection control community (particularly for ESBL-Ec and MRSA).

290

291 *vanA* VRE exhibits several important differences compared to the other study MDROs; it was  
292 more likely to be responsible for colonization than to cause infection, more likely to be  
293 detected later in admission (suggesting hospital acquisition), more likely to cause infections in  
294 patients in high-risk wards, and had much higher rates of in-hospital transmission by both  
295 genomics and epidemiological classification (76.7%). Whilst there is ongoing debate about the  
296 pathogenicity of this MDRO [34], in our setting it is clearly a healthcare-acquired pathogen,  
297 especially in high-risk wards, and provides an opportunity for intervention, where genomics can  
298 be used to accurately target infection control interventions to wards with demonstrated  
299 transmission. Importantly, genomics can untangle complex transmission networks, identifying  
300 transmission in wards where patients were previously admitted (including general and  
301 subacute care wards, which together comprised over 60% of wards with probable *vanA* VRE  
302 transmission), rather than the ward on which the VRE was identified (often high-risk wards with  
303 routine screening, only comprised 12.5% of wards with probable transmission).

304 Comprehensive genomic epidemiology allows for analysis of MDROs on both a population level  
305 and at the level of individual patients. In describing the complex MDRO population structures,  
306 we observed both similarities and differences to other studies locally and internationally, such  
307 as the absence of ST1424 *vanA* VRE, dominant in adjacent states in Australia [13], and a lower  
308 proportion of ST131 ESBL-Ec compared to other studies internationally [35]. Genomic analysis  
309 also uncovered unexpected antimicrobial resistance genes *mcr-1* (encoding colistin resistance, a  
310 last-resort antibiotic which is not routinely tested in diagnostic laboratories) and *rmtB* (plasmid-  
311 borne AMR gene encoding broad-spectrum aminoglycoside resistance), prompting additional  
312 infection control measures for affected patients in this study, which would not otherwise have  
313 been detected, and could potentially modify antibiotic choices for these patients.

314  
315 Genomic data has not previously been used to define an MDRO transmission rate based on  
316 patient throughput. However, this information could be potentially useful for benchmarking of  
317 hospitals, as well as potentially defining outcome measures in infection control intervention  
318 trials. Transmission analysis using a combination of genomics and epidemiology revealed a wide  
319 variation in the rates of transmission between different MDROs, with over 88% of *vanA* VRE  
320 isolates being designated as ‘probable’ or ‘possible transmission’ by study definitions. By  
321 contrast, the proportion of probable transmission for other MDROs was much lower (8.1% for  
322 MRSA to 23.3% for ESBL-Kp). Given that MRSA screening is uncommon in Victoria (as most  
323 hospitals do not isolate patients colonized with MRSA), the true rate of MRSA transmission is  
324 likely to be higher than seen in this study (as transmissions resulting only in colonization were  
325 not detected). Whilst the proportion of ESBL-Ec denoted ‘probable transmission’ was relatively

326 low at 10%, the raw number of transmissions is significant (20 highly-related patient pairs)  
327 given how frequently ESBL-Ec is found in this population; patients infected or colonized by  
328 ESBL-Ec are not currently isolated in most hospitals in Victoria, due in part to the large numbers  
329 of colonized patients and scarcity of isolation rooms (see Table 4).

330

331 There are several limitations to our study, including variations in MDRO screening practices  
332 between participating sites, potential differences in collection of clinical isolates and  
333 microbiology workup between different hospitals, potential bias in recall and recording of  
334 hospitalization history in last 12 months (from patient recall and medical history review; no  
335 centralized database available), and absence of reliable data regarding patient overseas travel.  
336 Similarly, our transmission analyses may be limited by only being able to collect epidemiologic  
337 data (admission history, ward and bed moves) for patients with isolates below a screening  
338 threshold for genomic relatedness; this was chosen due to limited resources, as ward data was  
339 collected manually and hence quite resource-intensive. The bioinformatic methods used for  
340 transmission analysis are constantly evolving and not yet well-defined (multiple methods  
341 currently being used internationally), and limited in that they are only able to detect clonal  
342 transmission of whole MDRO bacteria, and are not yet geared to detect transmission of MDRO  
343 plasmids (due to limitations of short-read sequencing).

344

345 Despite these limitations, we believe that this study demonstrates the value of comprehensive  
346 genomic surveillance for MDROs on a population scale, a hospital scale and even at the level of  
347 the individual patient, and the potential for genomics to inform hospital infection control, if it is



348 able to be applied in a timely manner. We plan to explore these concepts in a larger-scale  
349 translational study, using prospective genomics to detect transmission of hospital MDROs, in  
350 order to inform infection control interventions. Importantly, we need to be able to measure the  
351 potential benefits of genomics against the costs, in order to assess its likely utility in this setting.  
352  
353

354 **Funding**

355 This work was supported by the Melbourne Genomics Health Alliance (supported by the State  
356 Government of Victoria, Australia); and individual grants from National Health and Medical  
357 Research Council (Australia) to NLS (GNT1093468), JCK (GNT1008549) and BPH (GNT1105905).

358

359 **Acknowledgements**

360 Other members of the Controlling Superbugs Study Group include:

361 Elizabeth Grabsch (Department of Microbiology, Austin Health), Joanna Price and Carolyn  
362 Tullett (Infection Control, Austin Health), Despina Kotsanas (Department of Microbiology,  
363 Monash Health), Louise Wright (Infection Control, Monash Health), Dr Suraya Hanim Abdullah  
364 Hashim and Jennifer Mitchell (Department of Infectious Diseases, Melbourne Health), Tram  
365 Nguyen and Margaret Savanyo (Department of Microbiology, Melbourne Health) and Peter  
366 Pham (MDU Public Health Laboratory, University of Melbourne).

367

368 The authors would like to gratefully acknowledge the assistance of the following people:  
369 Courtney Lane (statistics advice), John Greenough, Jennifer Breen and Penny Birchmore  
370 (assistance with infection control queries and patient movement data) and Carol Wedge (data  
371 entry).

372

373 **References**

- 374 1. Cassini A, Högberg LD, Plachouras D, et al. Attributable deaths and disability-adjusted  
375 life-years caused by infections with antibiotic-resistant bacteria in the EU and the  
376 European Economic Area in 2015: a population-level modelling analysis. *Lancet Infect*  
377 *Dis* **2019**; 19(1): 56-66.
- 378 2. World Health Organization. Antimicrobial resistance: global report on surveillance.  
379 Geneva, Switzerland: WHO Press, **2014**.
- 380 3. Stewardson A, Fankhauser C, De Angelis G, et al. Burden of bloodstream infection  
381 caused by extended-spectrum beta-lactamase-producing *Enterobacteriaceae*  
382 determined using multistate modeling at a Swiss University Hospital and a nationwide  
383 predictive model. *Infect Control Hosp Epidemiol* **2013**; 34(2): 133-43.
- 384 4. de Kraker ME, Davey PG, Grundmann H. Mortality and hospital stay associated with  
385 resistant *Staphylococcus aureus* and *Escherichia coli* bacteremia: estimating the burden  
386 of antibiotic resistance in Europe. *PLoS medicine* **2011**; 8(10): e1001104.
- 387 5. Sherry NL, Lane CR, Kwong JC, et al. Genomics for molecular epidemiology and detecting  
388 transmission of carbapenemase-producing Enterobacterales in Victoria, Australia, 2012  
389 to 2016. *J Clin Micro* **2019**; 57(9).
- 390 6. Zhang R, Liu L, Zhou H, et al. Nationwide surveillance of clinical carbapenem-resistant  
391 Enterobacteriaceae (CRE) strains in China. *EBioMedicine* **2017**; 19: 98-106.
- 392 7. Mataseje LF, Abdesselam K, Vachon J, et al. Carbapenemase-producing  
393 Enterobacteriaceae in Canada: results from the Canadian Nosocomial Infection  
394 Surveillance Program, 2010-2014. *Antimicrob Agents Chemother* **2016**.

- 395 8. Findlay J, Hopkins KL, Alvarez-Buylla A, et al. Characterization of carbapenemase-  
396 producing Enterobacteriaceae in the West Midlands region of England: 2007-14. J  
397 Antimicrob Chemother **2017**; 72(4): 1054-62.
- 398 9. European Centre for Disease Prevention and Control. Surveillance of antimicrobial  
399 resistance in Europe - Annual report of the European Antimicrobial Resistance  
400 Surveillance Network (EARS-Net) 2017. Stockholm: ECDC, **2018**.
- 401 10. Pfeiffer CD, Cunningham MC, Poissant T, et al. Establishment of a statewide network for  
402 carbapenem-resistant Enterobacteriaceae prevention in a low-incidence region. Infect  
403 Control Hosp Epidemiol **2014**; 35(4): 356-61.
- 404 11. Coombs GW, Bell JM, Daley DA, et al. Australian Group on Antimicrobial Resistance  
405 Sepsis Outcomes Programs: 2017 Report. Sydney, Australia: ACSQHC, **2019**.
- 406 12. Easton M. Reports of bloodstream infections and meningitis to the Victorian Hospital  
407 Pathogen Surveillance Scheme, January to June 2010. Victorian Infect Dis Bulletin **2010**;  
408 13(3): 91-3.
- 409 13. Coombs GW, Daley DA, Australian Group on Antimicrobial Resistance. Australian  
410 Enterococcal Sepsis Outcome Program (AESOP) 2017 Final Report.  
411 <http://agargroup.org.au/agar-surveys>, **2018**.
- 412 14. van Hal SJ, Beukers AG, Timms VJ, et al. Relentless spread and adaptation of non-  
413 typeable *vanA* vancomycin-resistant *Enterococcus faecium*: a genome-wide  
414 investigation. J Antimicrob Chemother **2018**; 73(6): 1487-91.
- 415 15. Freeman JT, McBride SJ, Nisbet MS, et al. Bloodstream infection with extended-  
416 spectrum beta-lactamase-producing Enterobacteriaceae at a tertiary care hospital in

- 417 New Zealand: risk factors and outcomes. International journal of infectious diseases : Int  
418 J Infect Dis **2012**; 16(5): e371-4.
- 419 16. Laupland KB, Church DL, Vidakovich J, Mucenski M, Pitout JD. Community-onset  
420 extended-spectrum beta-lactamase (ESBL) producing *Escherichia coli*: importance of  
421 international travel. J Infect **2008**; 57(6): 441-8.
- 422 17. Kuster SP, Hasse B, Huebner V, et al. Risks factors for infections with extended-spectrum  
423 beta-lactamase-producing *Escherichia coli* and *Klebsiella pneumoniae* at a tertiary care  
424 university hospital in Switzerland. Infection **2010**; 38(1): 33-40.
- 425 18. Graffunder EM, Venezia RA. Risk factors associated with nosocomial methicillin-resistant  
426 *Staphylococcus aureus* (MRSA) infection including previous use of antimicrobials. J  
427 Antimicrob Chemother **2002**; 49(6): 999-1005.
- 428 19. Gorak EJ, Yamada SM, Brown JD. Community-acquired methicillin-resistant  
429 *Staphylococcus aureus* in hospitalized adults and children without known risk factors.  
430 Clin Infect Dis **1999**; 29(4): 797-800.
- 431 20. Gilbert EM, Zembower TR, Rhodes NJ, et al. Factors contributing to vancomycin-  
432 resistant *Enterococcus spp.* horizontal transmission events: exploration of the role of  
433 antibacterial consumption. Diagn Microbiol Infect Dis **2017**; 89(1): 72-7.
- 434 21. Chanderraj R, Millar JA, Patel TS, et al. Vancomycin-resistant *Enterococcus* acquisition in  
435 a tertiary care hospital: testing the roles of antibiotic use, proton pump inhibitor use,  
436 and colonization pressure. Open Forum Infect Dis **2019**; 6(4): ofz139.
- 437 22. Monteserin N, Larson E. Temporal trends and risk factors for healthcare-associated  
438 vancomycin-resistant enterococci in adults. J Hosp Infect **2016**; 94(3): 236-41.

- 439 23. Mellmann A, Bletz S, Boking T, et al. Real-time genome sequencing of resistant bacteria  
440 provides precision infection control in an institutional setting. *J Clin Microbiol* **2016**;  
441 54(12): 2874-81.
- 442 24. Ward DV, Hoss AG, Kolde R, et al. Integration of genomic and clinical data augments  
443 surveillance of healthcare-acquired infections. *Infect Control Hosp Epidemiol* **2019**;  
444 40(6): 649-55.
- 445 25. Croucher NJ, Page AJ, Connor TR, et al. Rapid phylogenetic analysis of large samples of  
446 recombinant bacterial whole genome sequences using Gubbins. *Nucl Acids Res* **2015**;  
447 43(3): e15.
- 448 26. Nguyen LT, Schmidt HA, von Haeseler A, Minh BQ. IQ-TREE: a fast and effective  
449 stochastic algorithm for estimating maximum-likelihood phylogenies. *Mol Biol Evol*  
450 **2015**; 32(1): 268-74.
- 451 27. Department of Health and Human Services Victoria. Victorian guideline on  
452 carbapenemase-producing Enterobacteriaceae for health services (version 2.1). In:  
453 Department of Communicable Disease Prevention and Control. Melbourne: Victorian  
454 Government, **2018**.
- 455 28. Clinical & Laboratory Standards Institute. CLSI M100-ED29: 2019 Performance standards  
456 for antimicrobial susceptibility testing (29th edition). **2019**.
- 457 29. European Committee on Antimicrobial Susceptibility Testing (EUCAST). Breakpoint  
458 tables for interpretation of MICs and zone diameters (version 9.0). Available at:  
459 [http://www.eucast.org/clinical\\_breakpoints/](http://www.eucast.org/clinical_breakpoints/). Accessed 26/7/2019.

- 460 30. Voor In 't Holt AF, Wattel AA, Boers SA, et al. Detection of healthcare-related extended-  
461 spectrum beta-lactamase-producing *Escherichia coli* transmission events using  
462 combined genetic and phenotypic epidemiology. PloS one **2016**; 11(7): e0160156.
- 463 31. Lowe CF, Katz K, McGeer AJ, Muller MP. Efficacy of admission screening for extended-  
464 spectrum beta-lactamase producing Enterobacteriaceae. PloS one **2013**; 8(4): e62678.
- 465 32. Arnaud I, Maugat S, Jarlier V, Astagneau P. Ongoing increasing temporal and  
466 geographical trends of the incidence of extended-spectrum beta-lactamase-producing  
467 Enterobacteriaceae infections in France, 2009 to 2013. Eurosurveillance **2015**; 20(36).
- 468 33. Martin P, Abou Chakra CN, Williams V, et al. Prevalence of antibiotic-resistant organisms  
469 in Canadian Hospitals: comparison of point-prevalence survey results from 2010, 2012,  
470 and 2016. Infect Control Hosp Epidemiol **2019**; 40(1): 53-9.
- 471 34. Vehreschild MJGT, Haverkamp M, Biehl LM, Lemmen S, Fatkenheuer G. Vancomycin-  
472 resistant enterococci (VRE): a reason to isolate? Infection **2019**; 47(1): 7-11.
- 473 35. Peirano G, van der Bij AK, Gregson DB, Pitout JD. Molecular epidemiology over an 11-  
474 year period (2000 to 2010) of extended-spectrum beta-lactamase-producing *Escherichia*  
475 *coli* causing bacteremia in a centralized Canadian region. J Clin Micro **2012**; 50(2): 294-9.

476  
477  
478  
479

480 **Table 1. Hospital sites and characteristics**

| Hospital network | Hospital code | Hospital description                                                                                                              | No. of inpatient beds | High-risk wards                                                            | MDRO screening practices during study period                                                                                                                                                                                                                                                                                                            |
|------------------|---------------|-----------------------------------------------------------------------------------------------------------------------------------|-----------------------|----------------------------------------------------------------------------|---------------------------------------------------------------------------------------------------------------------------------------------------------------------------------------------------------------------------------------------------------------------------------------------------------------------------------------------------------|
| <b>A</b>         | <b>A1</b>     | Tertiary referral center, including ICU, solid organ and bone marrow transplant                                                   | 560                   | ICU<br>Hematology/BMT and Oncology<br>Renal Transplant<br>Liver Transplant | ICU, hematology/oncology, renal and liver transplant wards screened on admission and twice weekly for <i>vanA</i> VRE and MRGN<br>Additional MRSA screening in ICU (on admission and twice weekly)<br>Quarterly point-prevalence survey for <i>vanA</i> VRE and MRGN<br>MRSA screening before critical surgeries (prosthetic joint, spinal and cardiac) |
|                  | <b>A2</b>     | Subacute hospital, aged care and rehabilitation services                                                                          | 150                   | None                                                                       | Quarterly point-prevalence survey for <i>vanA</i> VRE and MRGN                                                                                                                                                                                                                                                                                          |
|                  | <b>A3</b>     | Subacute hospital, rehabilitation services                                                                                        | 60                    | None                                                                       | Quarterly point-prevalence survey for <i>vanA</i> VRE and MRGN                                                                                                                                                                                                                                                                                          |
| <b>B</b>         | <b>B1</b>     | Tertiary referral center, including ICU and solid organ transplant and specialist pediatric hospital (including neonatal ICU)     | 640                   | ICU<br>Renal Transplant                                                    | ICU and renal ward screened for <i>vanA</i> VRE and carbapenem-resistant Gram negatives (CRGN) on admission and weekly<br>MRSA screening before cardiac surgery                                                                                                                                                                                         |
|                  | <b>B2</b>     | Tertiary referral center, including ICU and some aged care & rehabilitation services                                              | 573                   | ICU                                                                        | ICU patients screened for <i>vanA</i> VRE and carbapenem-resistant Gram negatives (CRGN) on admission and weekly                                                                                                                                                                                                                                        |
| <b>C</b>         | <b>C1</b>     | Tertiary referral center, including ICU, solid organ and bone marrow transplant                                                   | 571                   | ICU<br>Hematology/BMT                                                      | ICU and hematology ward screened on admission and weekly for <i>vanA</i> VRE and MRGN                                                                                                                                                                                                                                                                   |
|                  | <b>C2</b>     | Subacute hospital, aged care and rehabilitation services                                                                          | 150                   | None                                                                       | None                                                                                                                                                                                                                                                                                                                                                    |
| <b>D</b>         | <b>D1</b>     | Specialized cancer care center. Located adjacent to Hospital 3A (ICU patients cared for at 3A before transfer back to hospital 4) | 96                    | Hematology                                                                 | Hematology ward patients screened on admission and weekly for <i>vanA</i> VRE and MRGN                                                                                                                                                                                                                                                                  |

481 ICU, intensive care unit; MRGN, multi-resistant Gram negatives (includes ESBL and carbapenem-resistant phenotypes); BMT, bone  
 482 marrow transplant (allogeneic).



483 **Table 2. Laboratory definitions of MDROs**

| Organism                                                                             | Laboratory definition                                                                                                                                                                                     |
|--------------------------------------------------------------------------------------|-----------------------------------------------------------------------------------------------------------------------------------------------------------------------------------------------------------|
| <i>vanA</i> vancomycin-resistant <i>Enterococcus faecium</i> ( <i>vanA</i> VRE)      | Positive <i>vanA</i> PCR result (including <i>vanA+B</i> )                                                                                                                                                |
| Methicillin-resistant <i>Staphylococcus aureus</i> (MRSA)                            | Positive cefoxitin screen (disc <22mm or MIC>4mg/L) or oxacillin MIC >2mg/L                                                                                                                               |
| Ceftriaxone non-susceptible <i>E. coli</i> or <i>K. pneumoniae</i> (ESBL-Ec/ESBL-Kp) | <i>E. coli</i> or <i>K. pneumoniae</i> with ceftriaxone MIC ≥4mg/L<br>Excludes carbapenemase-producing Enterobacteriaceae (collected under statewide CPE surveillance program). AmpC phenotypes included. |
| Carbapenem non-susceptible <i>P. aeruginosa</i> (CRPa)                               | Meropenem MIC ≥8mg/L (resistant by CLSI criteria [28], intermediate/resistant by EUCAST criteria [29]) AND resistant to piperacillin-tazobactam AND ceftazidime                                           |
| Carbapenem non-susceptible <i>A. baumannii</i> (CRAb)                                | Meropenem MIC ≥8mg/L (resistant by CLSI criteria [28], intermediate/resistant by EUCAST criteria [29])                                                                                                    |

484

485

486 **Table 3. Summary of patient and isolate numbers**

|                                        | Species     |            |                 |              |              |              | Overall    |
|----------------------------------------|-------------|------------|-----------------|--------------|--------------|--------------|------------|
|                                        | ESBL-Ec     | MRSA       | <i>vanA</i> VRE | ESBL-Kp      | CRPa         | CRAb         |            |
| No. isolates (% total)                 | 214 (52.5%) | 88 (21.6%) | 64 (15.7%)      | 31 (7.6%)    | 9 (2.2%)     | 2 (0.5%)     | 408        |
| No. patients (% total) <sup>a</sup>    | 203 (56.7%) | 86 (24.0%) | 60 (16.8%)      | 30 (8.4%)    | 8 (2.2%)     | 2 (0.6%)     | 358        |
| % Male (% total patients) <sup>a</sup> | 51.7%       | 54.7%      | 61.7%           | 66.7%        | 62.5%        | 50.0%        | 55.3%      |
| Age in yrs (median, range)             | 68 (1-100)  | 62 (1-97)  | 67 (26-93)      | 66.5 (20-89) | 65.5 (28-82) | 52.5 (29-76) | 67 (1-100) |

487 Abbreviations: ESBL-Ec, extended-spectrum beta-lactamase phenotype *E. coli*; MRSA, methicillin-  
488 resistant *S. aureus*; *vanA* VRE, *vanA*-producing vancomycin-resistant *E. faecium*; ESBL-Kp, extended-  
489 spectrum beta-lactamase phenotype *K. pneumoniae*; CRPa, carbapenem-resistant *P. aeruginosa* (also  
490 resistant to piperacillin-tazobactam and ceftazidime); CRAb, carbapenem-resistant *A. baumannii*.

491 <sup>a</sup> Twenty-eight patients had more than one species isolated, hence percentages add to >100%

492 **Table 4. Rates of patient MDRO infection and/or colonization per 100,000 occupied bed days<sup>a</sup>**

|                                                           | Species |       |          |         |      |      | Overall |
|-----------------------------------------------------------|---------|-------|----------|---------|------|------|---------|
|                                                           | ESBL-Ec | MRSA  | vanA VRE | ESBL-Kp | CRPa | CRAb |         |
| <b>All wards</b>                                          |         |       |          |         |      |      |         |
| MDRO infections                                           | 50.0    | 42.9  | 4.8      | 6.3     | 3.2  | 0.0  | 107.1   |
| MDRO colonization                                         | 112.7   | 25.4  | 42.9     | 17.5    | 3.2  | 1.6  | 203.2   |
| Total burden                                              | 152.4   | 66.7  | 44.4     | 23.0    | 6.3  | 1.6  | 294.5   |
| Clinical isolates                                         |         |       |          |         |      |      |         |
| Blood cultures                                            | 77.0    | 64.3  | 9.5      | 11.1    | 6.3  | 1.6  | 169.8   |
|                                                           | 7.9     | 5.6   | 3.2      | 1.6     | -    | -    | 18.3    |
| <b>High-risk wards &amp; ICU<sup>b</sup></b>              |         |       |          |         |      |      |         |
| MDRO infections                                           | 50.4    | 63.0  | 18.9     | 6.3     | 12.6 | 0.0  | 151.1   |
| MDRO colonization                                         | 421.9   | 50.4  | 226.7    | 37.8    | 25.2 | 12.6 | 774.5   |
| Total burden                                              | 453.3   | 107.0 | 245.6    | 44.1    | 37.8 | 12.6 | 900.4   |
| <b>MDRO infection</b>                                     |         |       |          |         |      |      |         |
| Relative risk for high-risk wards compared to other wards | 0.97    | 1.54  | 6.93     | 0.99    | 6.93 | -    | 1.46    |

493 Abbreviations: ESBL-Ec, extended-spectrum beta-lactamase *E. coli*; MRSA, methicillin-resistant *S. aureus*;  
 494 *vanA* VRE, *vanA*-producing vancomycin-resistant *E. faecium*; ESBL-Kp, extended-spectrum beta-  
 495 lactamase *K. pneumoniae*; CRPa, carbapenem-resistant *P. aeruginosa* (also resistant to piperacillin-  
 496 tazobactam and ceftazidime); CRAb, carbapenem-resistant *A. baumannii*; MDRO, multidrug-resistant  
 497 organism.

498 <sup>a</sup> Occupied bed days - number of patients admitted overnight (excluding mental health and hospital-in-  
 499 the-home services).

500 <sup>b</sup> High-risk wards, includes hematology, oncology, renal ward (including renal transplant), and liver  
 501 transplant wards; ICU, intensive care unit.

502 Note: Total burden less than infection + colonization as duplicates excluded.

503

504 **Table 5. Likelihood of MDRO transmission by epidemiology by species**

| Likelihood of transmission by epidemiology <sup>a</sup>         | Species     |            |            |           | Overall <sup>b</sup> (%) |
|-----------------------------------------------------------------|-------------|------------|------------|-----------|--------------------------|
|                                                                 | ESBL-Ec     | MRSA       | vanA VRE   | ESBL-Kp   |                          |
| <b>Total no. of patients in study with MDRO</b>                 | 203 (56.7%) | 86 (24.0%) | 60 (16.8%) | 30 (8.4%) | 358                      |
| <b>No. of patients with potential genomic links<sup>c</sup></b> | 41 (20.2%)  | 8 (9.3%)   | 57 (95.0%) | 7 (23.3%) | 113 (31.6%)              |
| <b>No. of patients (%) in each epidemiologic category</b>       |             |            |            |           |                          |
| Probable                                                        | 20 (9.9%)   | 5 (5.8%)   | 46 (76.7%) | 7 (23.3%) | 78 (21.8%)               |
| Possible                                                        | 10 (4.9%)   | 2 (2.3%)   | 7 (11.7%)  | -         | 19 (5.3%)                |
| Unlikely                                                        | 11 (5.4%)   | 1 (1.2%)   | 4 (6.7%)   | -         | 16 (4.5%)                |
| Same patient                                                    | 6 (3.0%)    | 2 (2.3%)   | -          | -         | 8 (2.2%)                 |
| <b>No. of transmission events per 100,000 OBDs<sup>d</sup></b>  |             |            |            |           |                          |
| Probable                                                        | 15.9        | 4.0        | 36.5       | 5.6       | 61.9                     |
| Probable + Possible                                             | 23.8        | 5.6        | 50.0       | 5.6       | 77.0                     |
| <b>Wards associated with probable transmissions<sup>e</sup></b> |             |            |            |           |                          |
| Intensive care                                                  | 27.6%       | 5.9%       | 12.5%      | -         | 23.3%                    |
| High-risk wards <sup>f</sup>                                    | 8.6%        | 5.9%       | -          | -         | 7.5%                     |
| Other acute wards                                               | 21.0%       | 47.1%      | 37.5%      | 100%      | 27.1%                    |
| Subacute care <sup>g</sup>                                      | 2.9%        | 29.4%      | 25.0%      | -         | 7.5%                     |
| Day ward/operating theatre                                      | 3.8%        | -          | 12.5%      | -         | 3.8%                     |

505 <sup>a</sup> Definitions of likelihood of transmission by epidemiology: Probable, patients admitted to same ward at the same  
 506 time; Possible, patients admitted to same hospital at same time, or same ward within 60 days (but without  
 507 overlapping stays); Unlikely, all other patients outside these definitions; Same patient, isolates from same patient  
 508 at different times. Reference: [30]

509 <sup>b</sup> Some patients represented under >1 species, hence totals may add to more than overall number of patients.

510 <sup>c</sup> Potential genomic links: Isolates analyzed for core genome single nucleotide polymorphisms (SNPs) by species  
 511 and ST; isolate pairs with SNP distances below the transmission screening threshold ( $\leq 15$  SNPs (MRSA) or  $\leq 25$  SNPs  
 512 (other species), excluding same patient pairs) were designated as 'potential genomic links' for further  
 513 epidemiologic investigation.

514 <sup>d</sup> No. of patients with both genomic and epidemiologic links to other patients in the study. OBDs, Occupied bed  
 515 days - number of patients admitted overnight (excluding mental health and hospital-in-the-home services).

516 <sup>e</sup> For some patient pairs, admissions overlapped in multiple wards.

517 <sup>f</sup> High-risk wards, includes hematology, oncology, renal ward (including renal transplant), and liver transplant  
 518 wards.

519 <sup>g</sup> Subacute care, includes aged care, rehabilitation, palliative care and spinal wards.

520

521 **Figure 1. Overview of study design**

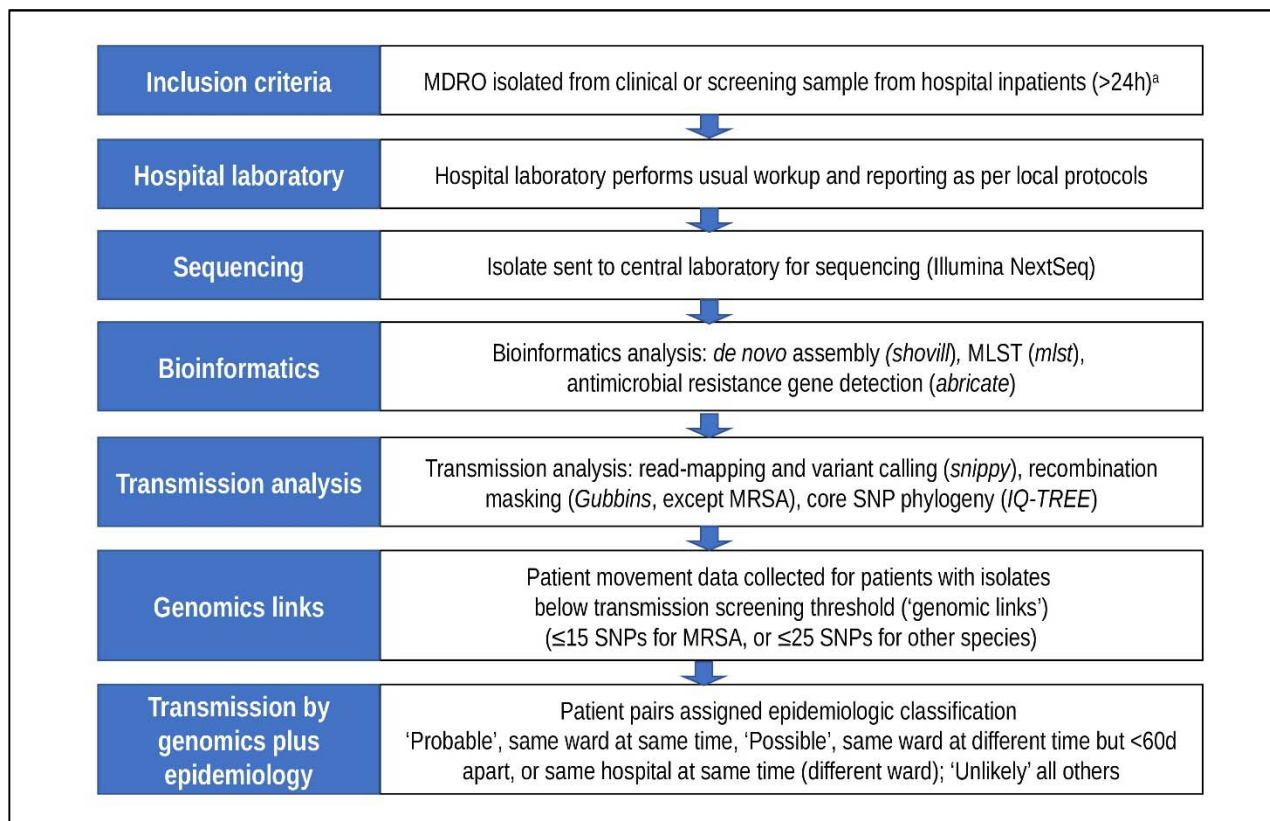

522

523 <sup>a</sup>Excluded duplicate clinical isolates within 14d, and subsequent screening isolates, of same

524 species and ST.

525 Note: carbapenemase-producing Enterobacterales excluded as already covered by existing

526 state-wide genomic surveillance program [5].

527 MLST, multilocus sequence typing; SNP, single nucleotide polymorphism. Names of

528 bioinformatics tools listed in italics.

529 References for bioinformatics tools: *shovill* (v1.0.4; <https://github.com/tseemann/shovill>), *mlst*

530 (<https://github.com/tseemann/mlst>), *abricate* (v0.9.5, <https://github.com/tseemann/abricate>),

531 *snippy* (<https://github.com/tseemann/snippy>), *Gubbins* [25], *IQ-TREE* [26].

532

29

533 **Figure 2. Characteristics of isolates – reason for sample collection, and specimen type**

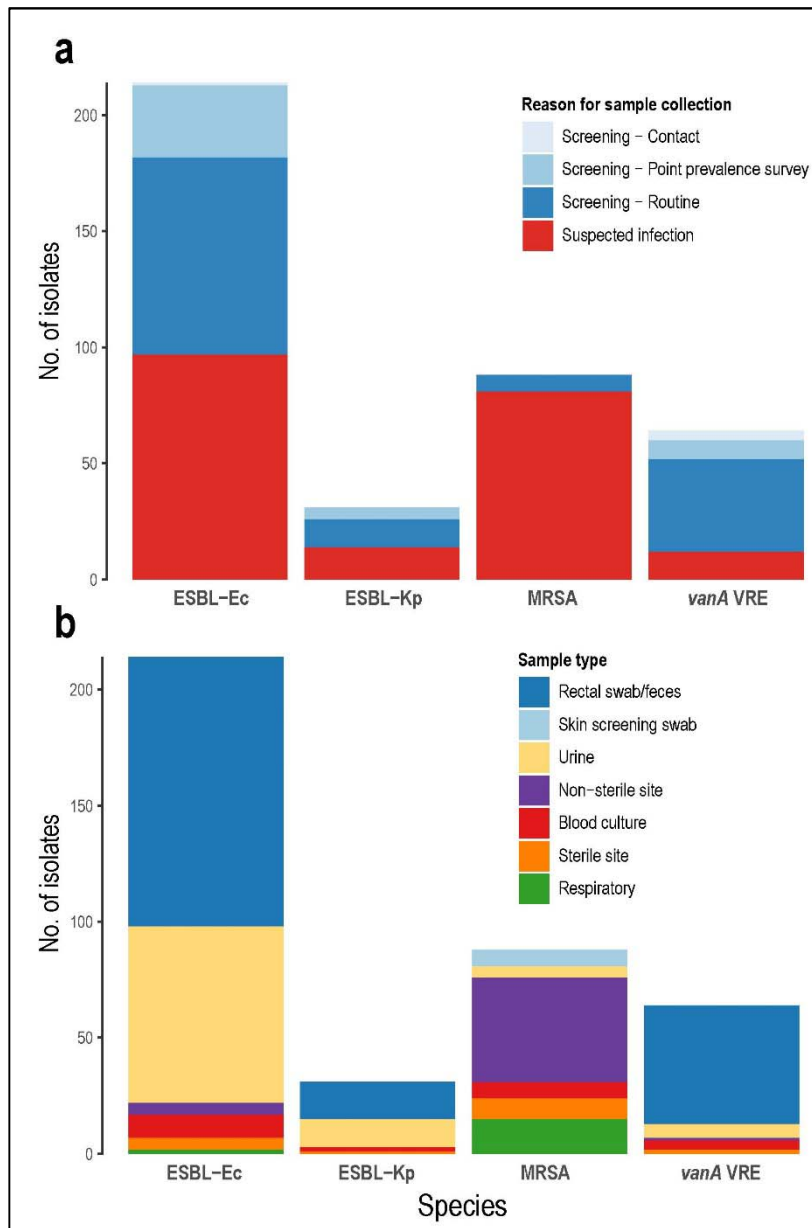

534

535 **Fig 2a** Reason for sample collection; **Fig 2b** Sample type

536 Abbreviations: ESBL-Ec, extended-spectrum beta-lactamase phenotype *E. coli*; MRSA,

537 methicillin-resistant *S. aureus*; vanA VRE, vanA-producing vancomycin-resistant *E. faecium*;

538 ESBL-Kp, extended-spectrum beta-lactamase phenotype *K. pneumoniae*. See Supplementary

539 Tables S2 and S3 for further details.

540 **Figure 3. Patient admission source and history**

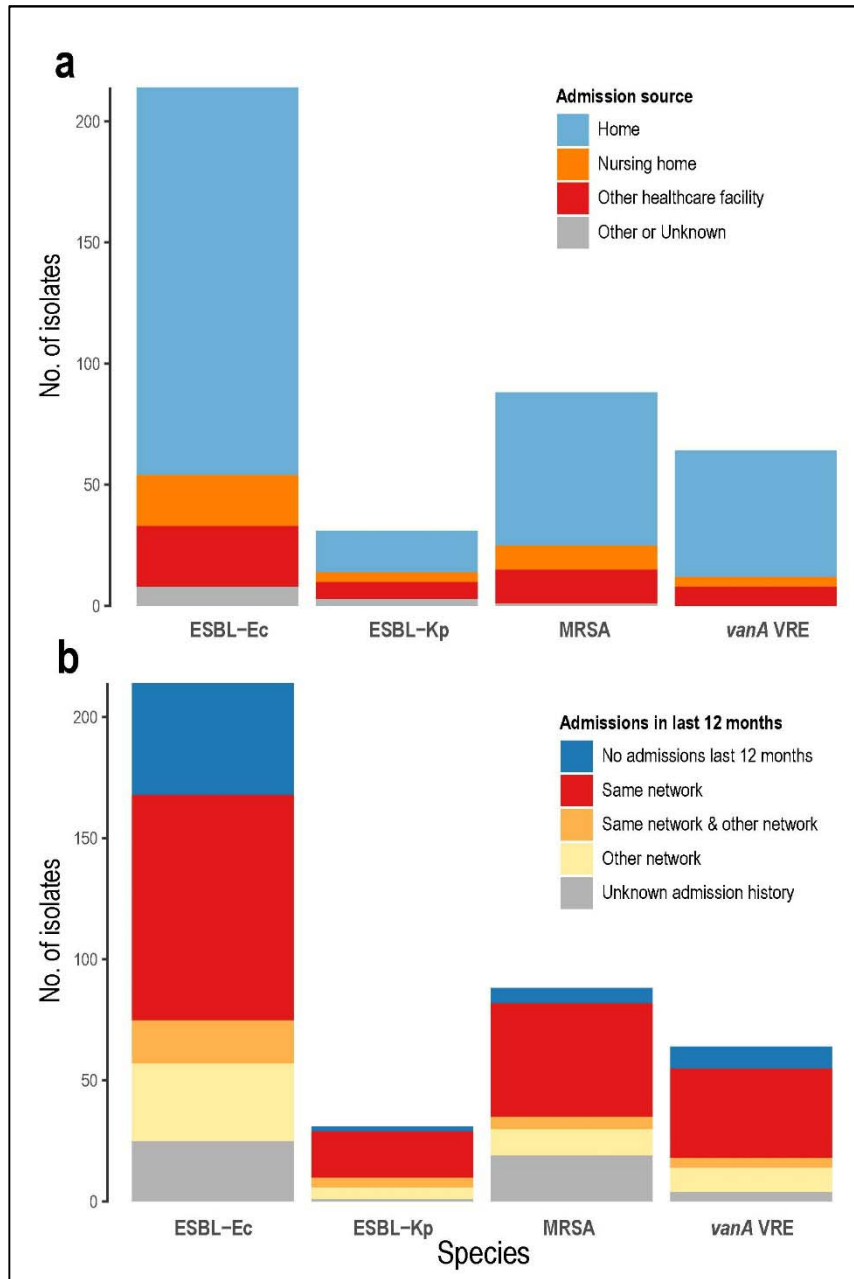

541

542 **Fig 3a** Admission source (where patient was admitted from); **Fig 3b** Admission history in

543 previous 12 months. See Supplementary Table S2 for further details

544

545 **Figure 4. Rates of MDRO infection and colonization per 100,000 occupied bed days (OBDs)**

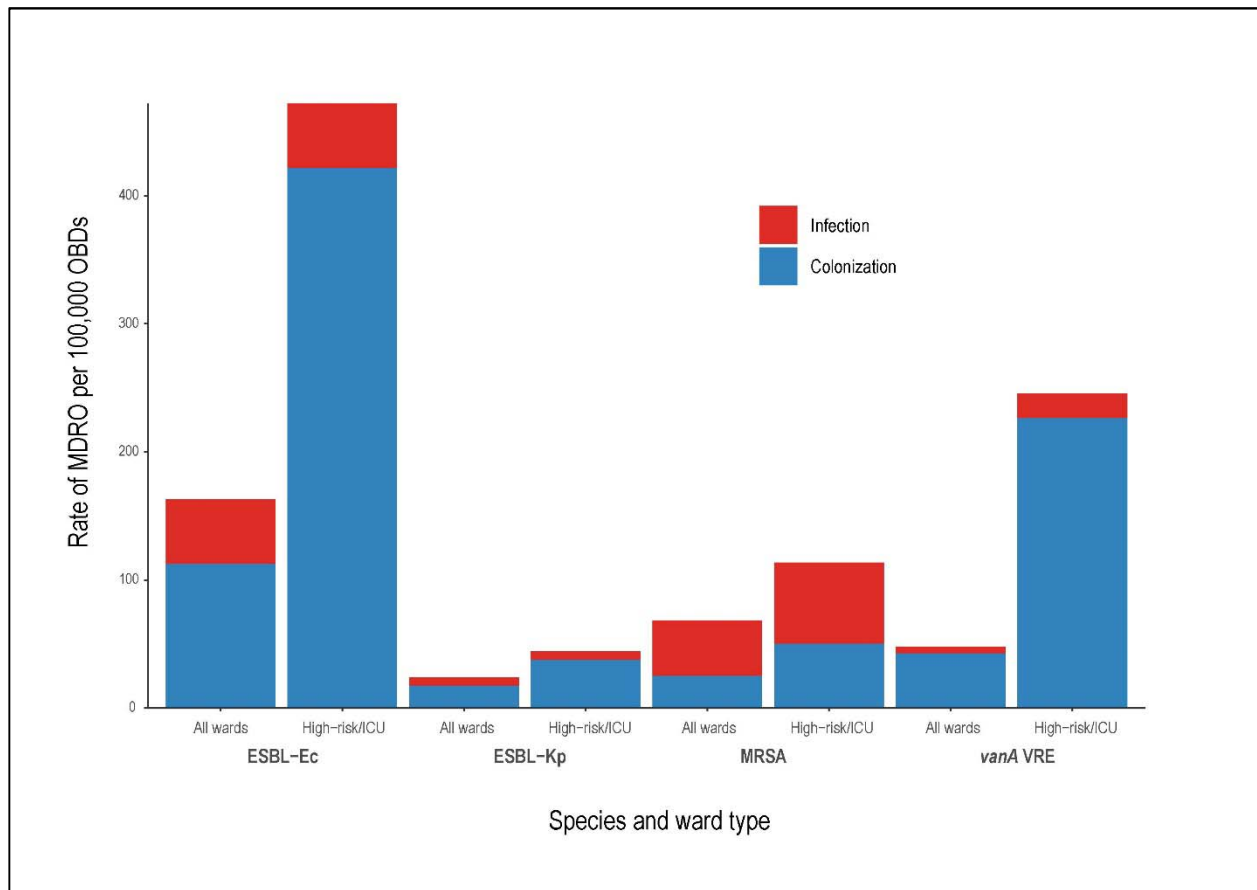

546

547 Abbreviations: ESBL-Ec, extended-spectrum beta-lactamase phenotype *E. coli*; MRSA,  
548 methicillin-resistant *S. aureus*; vanA VRE, vanA-producing vancomycin-resistant *E. faecium*;

549 ESBL-Kp, extended-spectrum beta-lactamase phenotype *K. pneumoniae*.

550 High-risk wards include hematology, oncology, renal ward (including renal transplant), liver  
551 transplant ward, and ICU (intensive care unit). Occupied bed day defined as number of beds

552 occupied by patients at midnight, excluding day cases, mental health and hospital-in-the-home.

553 See Supplementary Table S4 for more detailed data

554

555



556 **Figure 5. Time from patient admission to isolate collection, by species and reason for sample**  
557 **collection**

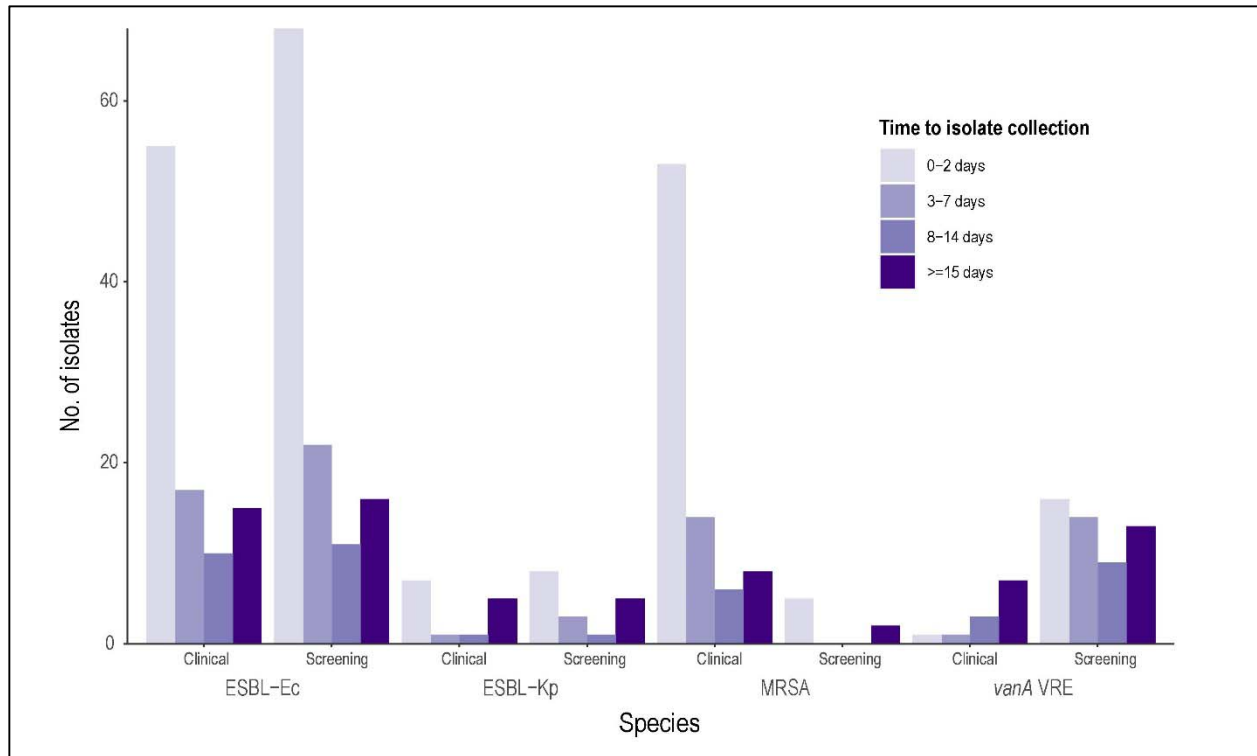

558  
559 Abbreviations: ESBL-Ec, extended-spectrum beta-lactamase phenotype *E. coli*; MRSA,  
560 methicillin-resistant *S. aureus*; vanA VRE, vanA-producing vancomycin-resistant *E. faecium*;  
561 ESBL-Kp, extended-spectrum beta-lactamase phenotype *K. pneumoniae*.

562 <sup>a</sup> Percentage of clinical or screening isolates of this species

563 Clinical isolates, from samples collected for suspected infection. Screening isolates, from  
564 samples collected for MDRO surveillance.

565

566

567 **Figure 6. Most common multi-locus sequence types identified in this study**

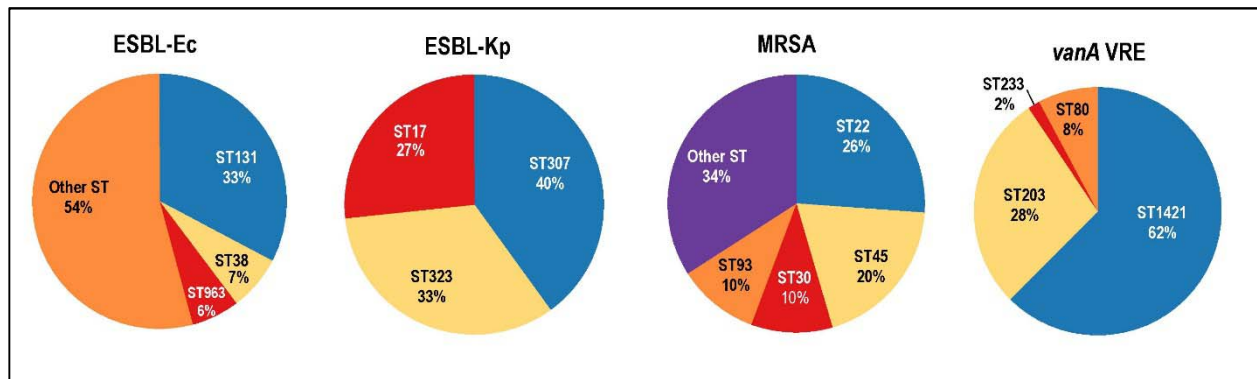

568

569 Abbreviations: ESBL-Ec, extended-spectrum beta-lactamase phenotype *E. coli*; MRSA,  
570 methicillin-resistant *S. aureus*; *vanA* VRE, *vanA*-producing vancomycin-resistant *E. faecium*;  
571 ESBL-Kp, extended-spectrum beta-lactamase phenotype *K. pneumoniae*; ST, sequence type.

572

573

574 **Figure 7. Transmission analysis results**

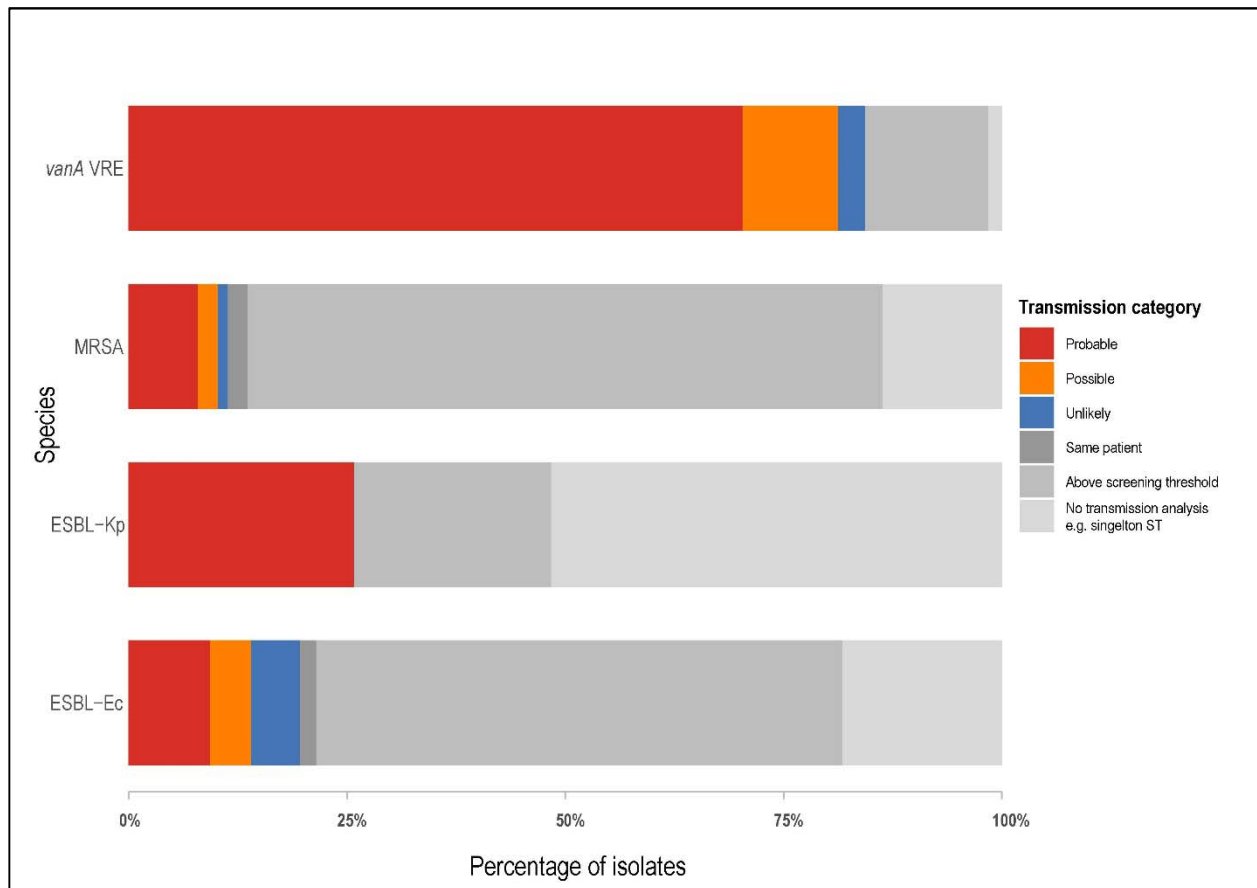

575 **Transmission categories:** 'Probable', patients admitted to same ward at the same time;  
576 'Possible', patients admitted to same hospital at same time, or same ward within 60 days (but  
577 without overlapping stays); 'Unlikely', all other patients outside these definitions; 'Same  
578 patient', isolates from same patient at different times; 'Above screening threshold', pairwise  
579 distances between isolates exceeded the transmission screening threshold ( $\geq 15$  SNPs for MRSA,  
580  $\geq 25$  SNPs for other species); 'No transmission analysis', isolates did not meet criteria for  
581 transmission analysis (ST only contained a single isolate, or only isolates from a single patient).  
582

583

584 **Figure 8. Transmission analysis: pairwise SNP distribution by species, ST and epidemiology**

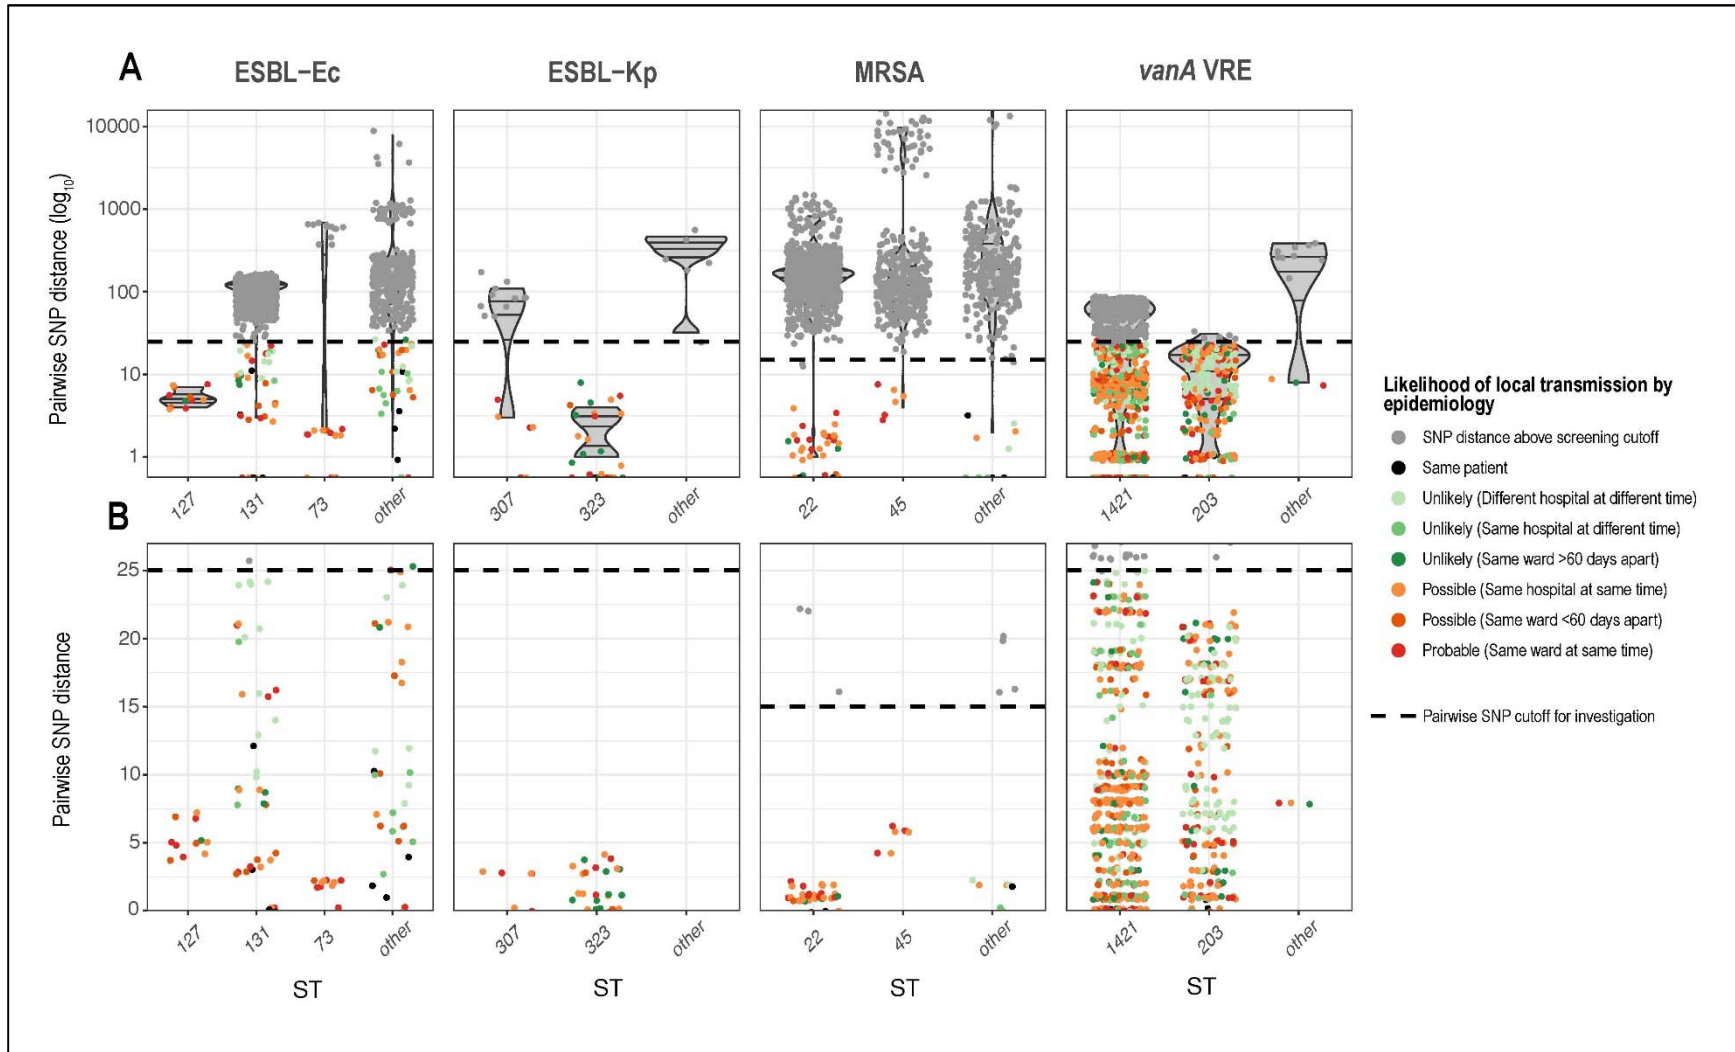

585

586 **Panel A:** overall view of pairwise SNP distances for each species, grouped by most common sequence types (ST), and other STs  
587 (note:  $\log_{10}$  scale). **Panel B:** zoomed-in view of pairwise SNP distances for each species (linear scale). Dotted line represents  
588 transmission screening threshold of 15 SNPs for MRSA, and 25 SNPs for other species; bed move data only collected for patients  
589 with at least one isolate below this threshold. Each dot represents a pair of isolates; dots are colored by likelihood of local  
590 transmission by epidemiology (grey represents no data collected as pairwise SNP distance was above the transmission screening  
591 threshold).
